# Supplementary material for: Structural Elucidation of β1- and β2-Transferrin Using Microprobe-Capture In-Emitter Elution and High-Resolution Mass Spectrometry
Source: bioRxiv or medRxiv preprint supplement (doi:10.1101/2023.01.29.23285161), 2023-01-31
Supplement: Supplementary file [file media-1.pdf]

## Supplemental Material

Structural Elucidation of  $\beta_1$ - and  $\beta_2$ -Transferrin Using Microprobe-Capture In-Emitter Elution  
and High-Resolution Mass Spectrometry

Ruben Yiqi Luo<sup>1,2</sup>, Christopher Pfaffroth<sup>2</sup>, Samuel Yang<sup>1</sup>, Kevin Hoang<sup>2</sup>, Priscilla S.-W.

Yeung<sup>1,2</sup>, James L. Zehnder<sup>1,2</sup>, Run-Zhang Shi<sup>1,2</sup>

<sup>1</sup>Department of Pathology, Stanford University, Stanford, CA, USA

<sup>2</sup>Clinical Laboratories, Stanford Health Care, Palo Alto, CA, USA

Running Title: Elucidation of  $\beta_1$ - and  $\beta_2$ -Transferrin Using MPIE Coupled with HR-MS

Corresponding Author: Ruben Yiqi Luo

Address: 3375 Hillview Ave, Palo Alto, CA 94304

Tel: 650-724-1318

Email: [rubenluo@stanford.edu](mailto:rubenluo@stanford.edu)

Key Words:  $\beta_1$ -Transferrin,  $\beta_2$ -Transferrin, MPIE, HR-MS, N-Glycan

Figure S1

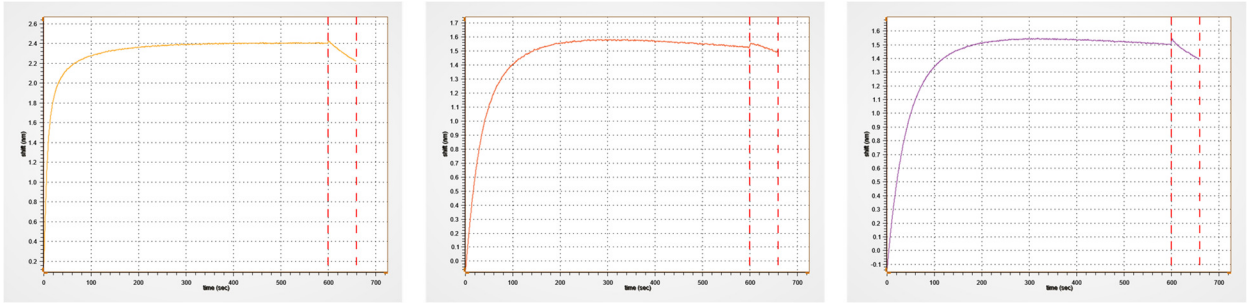

Figure S1. BLI sensorgrams obtained on the 3 microprobes capturing Tf from a serum sample (left), a CSF sample (middle), and a secretion sample from a patient diagnosed of CSF leak (right) (same samples as in Figure 1).

Figure S2

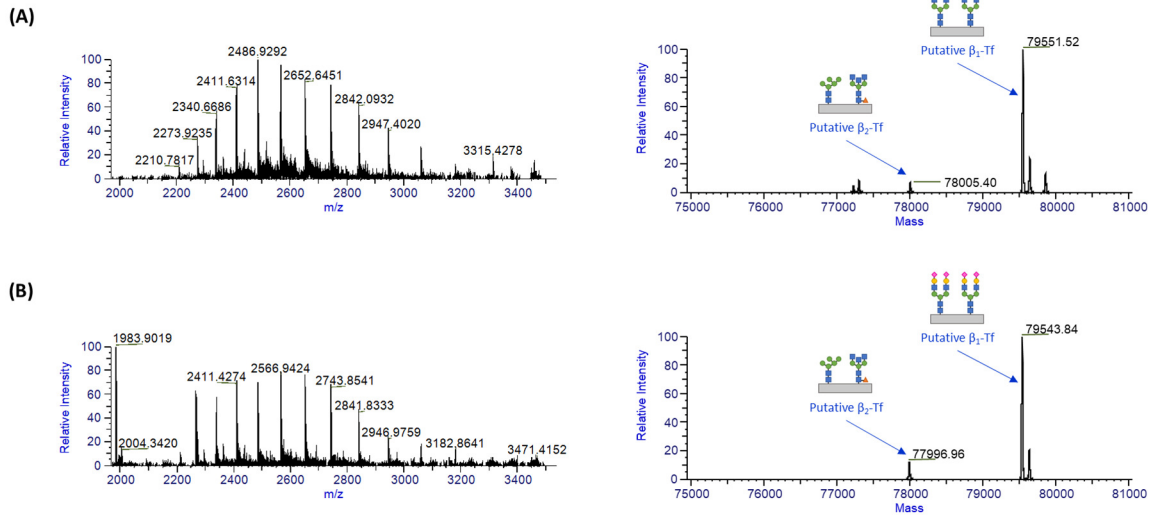

Figure S2. The MPE-ESI-MS results of two CSF samples containing Tf variants (A) and (B): HR-MS raw mass spectra of captured Tf molecules (left) and deconvoluted mass spectra (right), showing the Tf glycoforms. The molecular masses of the putative  $\beta_1$ -Tf and  $\beta_2$ -Tf were different

from those of  $\beta_1$ -Tf and  $\beta_2$ -Tf in normal CSF samples, but the mass difference between the two Tf glycoforms retained as 1546 Da.

**Table S1**

Table S1. MS peak intensities of  $\beta_1$ -Tf and  $\beta_2$ -Tf in the deconvoluted mass spectra (the entire time window of Tf elution selected for deconvolution): a pooled CSF sample was mixed with water at 1:1, 1:4, 1:9, and 1:19 ratios, the neat pooled CSF sample, and the pooled CSF sample spiked with 10  $\mu\text{g/ml}$  and 100  $\mu\text{g/ml}$  Tf standard.

| Sample                  | MS Peak Intensity of $\beta_1$ -Tf | MS Peak Intensity of $\beta_2$ -Tf |
|-------------------------|------------------------------------|------------------------------------|
| 1:1 Pooled CSF : Water  | $4.10 \times 10^5$                 | $1.62 \times 10^5$                 |
| 1:4 Pooled CSF : Water  | $2.52 \times 10^5$                 | $7.03 \times 10^4$                 |
| 1:9 Pooled CSF : Water  | $9.47 \times 10^4$                 | $1.98 \times 10^4$                 |
| 1:19 Pooled CSF : Water | $4.18 \times 10^4$                 | Not Detected                       |
